# Supplementary material
Source: PubMed Central journal article supplement (PMC1533987)
Supplement: plntcell_tpc.106.043000_1.pdf [file plntcell_tpc.106.043000_1.pdf]

Supplemental Table 1. Sequences of primers and PCR conditions applied for semi-quantitative RT-PCR.

| Gene          | GenBank accession | Forward primer                     | Reverse primer                   | Annealing temp (°C) | Optimal cycle | Expected size (bp) |
|---------------|-------------------|------------------------------------|----------------------------------|---------------------|---------------|--------------------|
| <i>Actin1</i> | AC091532          | 5'- ACAGGTATTGTGGACTC -3'          | 5'- GCTTAGCATTCTGGGTCC -3'       | 60                  | 25            | 709                |
| <i>Sub1A</i>  | DQ011598          | 5'- AGGTGAAAATGATGCAGG -3'         | 5'- CTTCCCCTGCATATGATATG -3'     | 50                  | 28            | 614                |
| <i>Sub1B</i>  | AP005705          | 5'- TTTCCATGTTCCCTTCTGGTG -3'      | 5'- GCTGCTAATTAACCATTCCAAAAC -3' | 60                  | 38            | 567                |
| <i>Sub1C</i>  | AP006758          | 5'- CGTGGTAGTGACAAGTGCCTC -3'      | 5'- CGTTTATGTTGCTCCTGAATCTGC -3' | 60                  | 28            | 535                |
| <i>ExpA1</i>  | AL731598          | 5'- AACGATGGGTGGGGCGTG -3'         | 5'- TTTACACGCCGACGCCGATG -3'     | 60                  | 30            | 727                |
| <i>ExpA5</i>  | AP005297          | 5'- ACC ATG GGA GGG GCG TGC -3'    | 5'- CAACTACCACGACGATGCTCGAG -3'  | 60                  | 32            | 677                |
| <i>ExpA6</i>  | AP008209          | 5'- ACGATGGGTGGCGCGTG -3'          | 5'- AGACCTCACTAAACACCGATTGG -3'  | 60                  | 32            | 741                |
| <i>ExpA7</i>  | AC093018          | 5'- TCTCCTACCGCCGGGTGC -3'         | 5'- CCAACCAACATGATGCAGTATCC -3'  | 60                  | 38            | 623                |
| <i>ExpA16</i> | AP003539          | 5'- TTCGGAGGGTGAGCTGTGAC -3'       | 5'- CGTTTGCCATGCTGAGCAGATC -3'   | 60                  | 30            | 455                |
| <i>RAmy3C</i> | AP005891          | 5'- ACCCTGCATTTTCTACGACC -3'       | 5'- GTCCTGAAAGAAATATTTGGC -3'    | 57                  | 33            | 313                |
| <i>RAmy3D</i> | AP004399          | 5'- TCCCCTGCATCTTCTACGAC -3'       | 5'- TACTGCATCCTGAACCTGAC -3'     | 57                  | 27            | 563                |
| <i>RAmy3E</i> | AP004457          | 5'- TCCCATGCATCTTCTACGAC -3'       | 5'- ACGAAGCGTACATCGATCG -3'      | 60                  | 36            | 431                |
| <i>Sus1</i>   | AC084380          | 5'- TTGTGCAGCCCGCTTCTAC -3'        | 5'- AAGAGCAGTGCCTAGGAATGC -3'    | 57                  | 25            | 578                |
| <i>Sus2</i>   | AP004280          | 5'- CGATGAACACAAGTTTGTATTGAAGG -3' | 5'- CAAATTCGAATGCAGCTGACG -3'    | 57                  | 22            | 819                |
| <i>Sus3</i>   | AP004988          | 5'- GAGCACAAAGTTTGTCTGAAGG -3'     | 5'- GAGCACCCATTGCCCATTC -3'      | 57                  | 35            | 799                |
| <i>Pdc1</i>   | AC121364          | 5'- CGGGTACGAGTTCAGATG -3'         | 5'- AGAAGCTCTTTGCTCGTGTC -3'     | 57                  | 28            | 426                |
| <i>Pdc2</i>   | AC137072          | 5'- CTGCGGGTATGAATCCAAATG -3'      | 5'- GATTTGGTGGCCTGGAGTTG -3'     | 57                  | 25            | 473                |
| <i>Pdc4</i>   | AC121364          | 5'- TGACGGTAGCTCCAGATGAC -3'       | 5'- ATACTTCAACCTCTCGGCTG -3'     | 54                  | 30            | 520                |
| <i>Adh1</i>   | AC123521          | 5'- CCAGTTCAGCAGGTAATTGC -3'       | 5'- CAGGATACACAGAAGAACC -3'      | 54                  | 20            | 484                |
| <i>Adh2</i>   | AC123515          | 5'- CACGAGGTGCTGATTGAG -3'         | 5'- CAAGATCAAGCCATGAAAGG -3'     | 54                  | 25            | 583                |
